# Supplementary material for: Facile and scalable synthesis of un-doped, doped and co-doped graphene quantum dots: a comparative study on their impact for environmental applications
Source: Royal Society of Chemistry journal article supplement (doi:10.1039/d2ra05275j), 2022-12-23
Supplement: d2ra05275j1.pdf [file d2ra05275j1.pdf]

## SUPPORTING INFORMATION

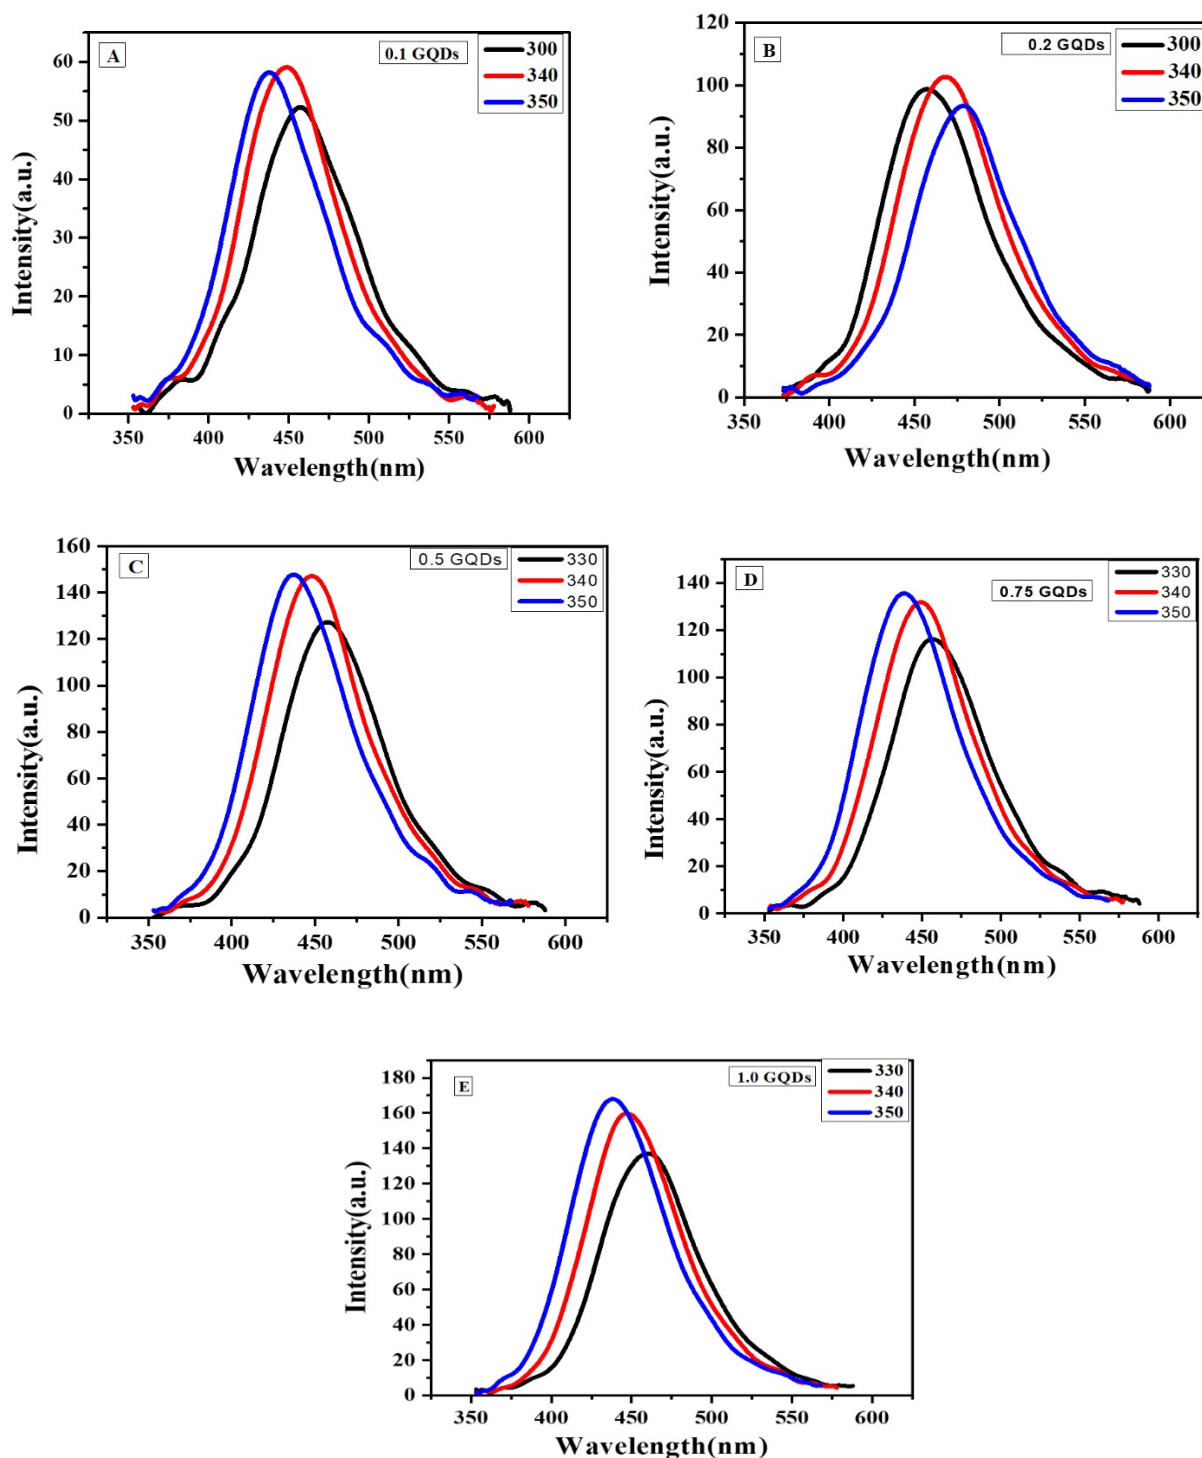

**Fig. S1.** Fluorescence spectra for studying the effect of concentration of GQDs: (a) 0.1 a.u., (b) 0.25 a.u., (c) 0.50 a.u., (d) 0.75 a.u. and 1.0 a.u. along with three different energy of excitation.

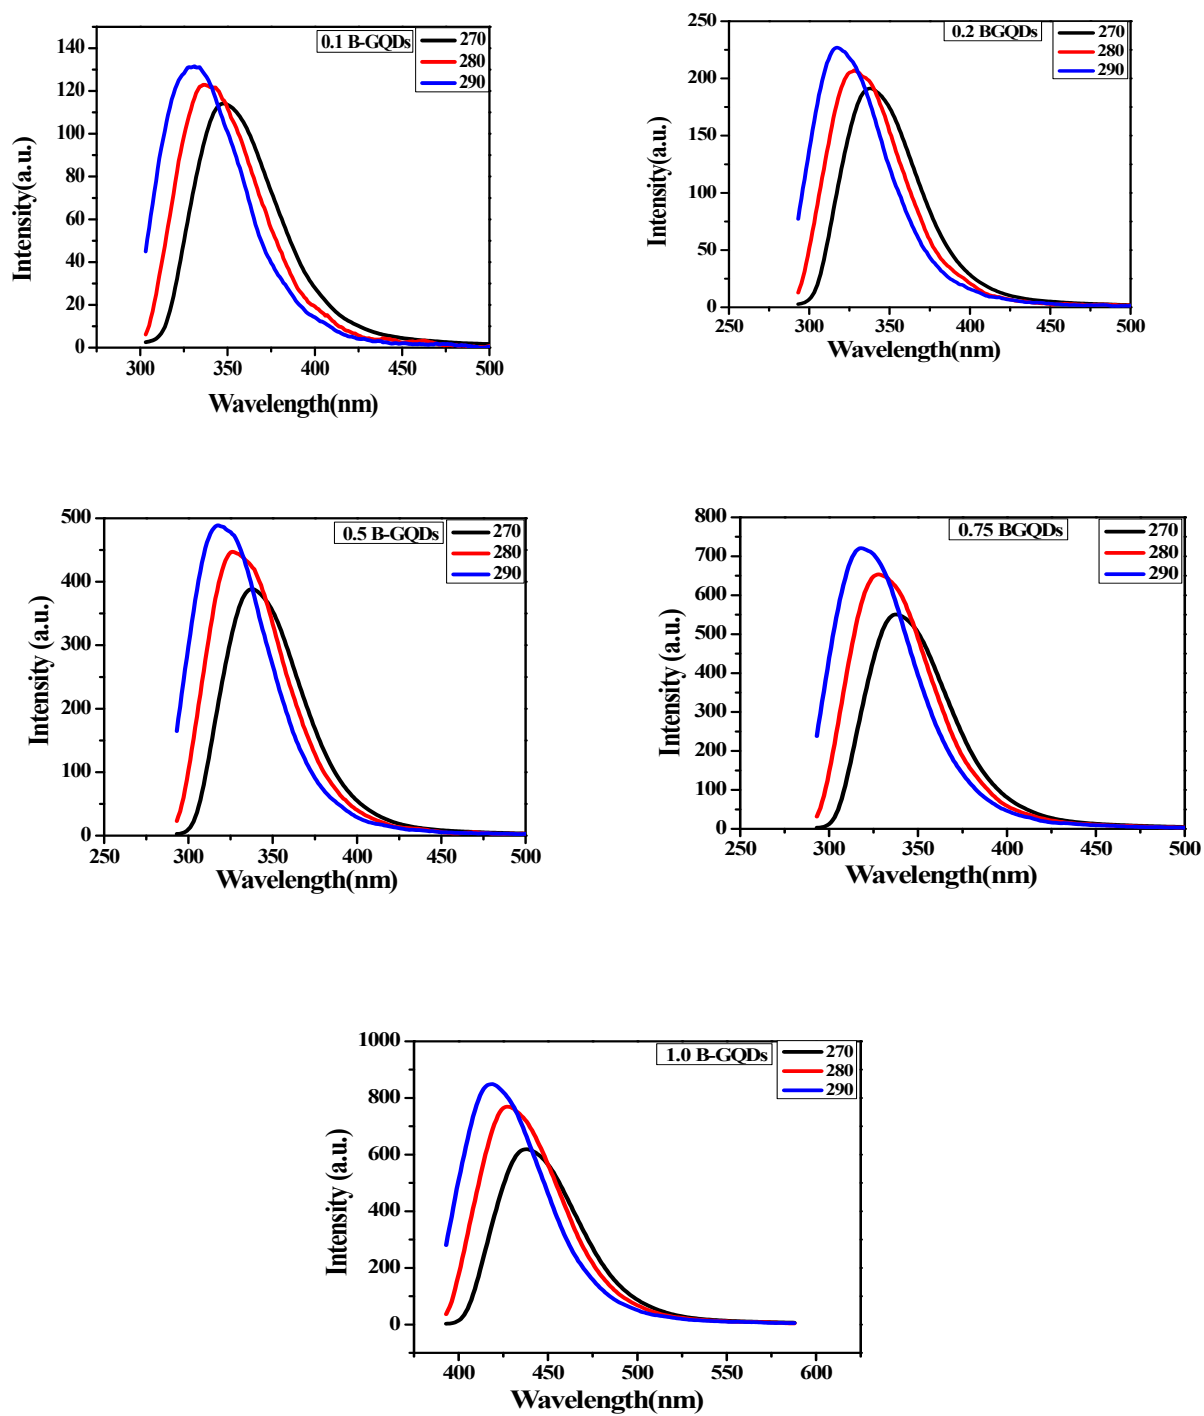

**Fig. S2.** Fluorescence spectra for studying the effect of concentration of B-GQDs: (a) 0.1 a.u., (b) 0.25 a.u., (c) 0.50 a.u., (d) 0.75 a.u. and 1.0 a.u. along with three different energy of excitation.

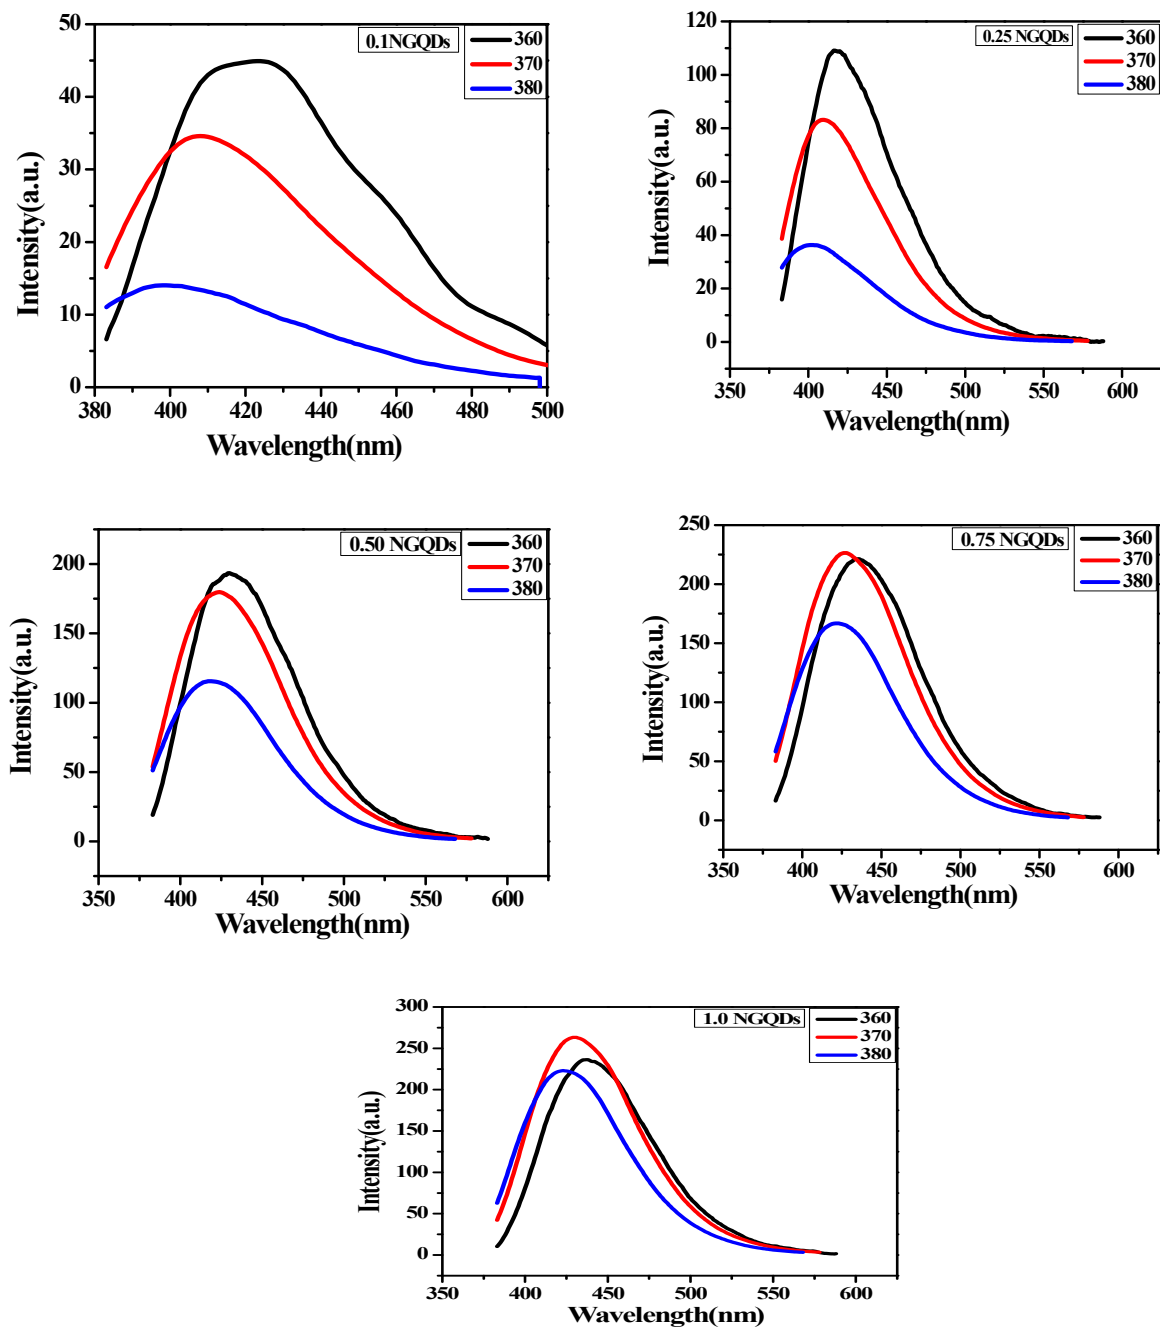

**Fig. S3.** Fluorescence spectra for studying the effect of concentration of N-GQDs: (a) 0.1 a.u., (b) 0.25 a.u., (c) 0.50 a.u., (d) 0.75 a.u. and 1.0 a.u. along with three different energy of excitation.

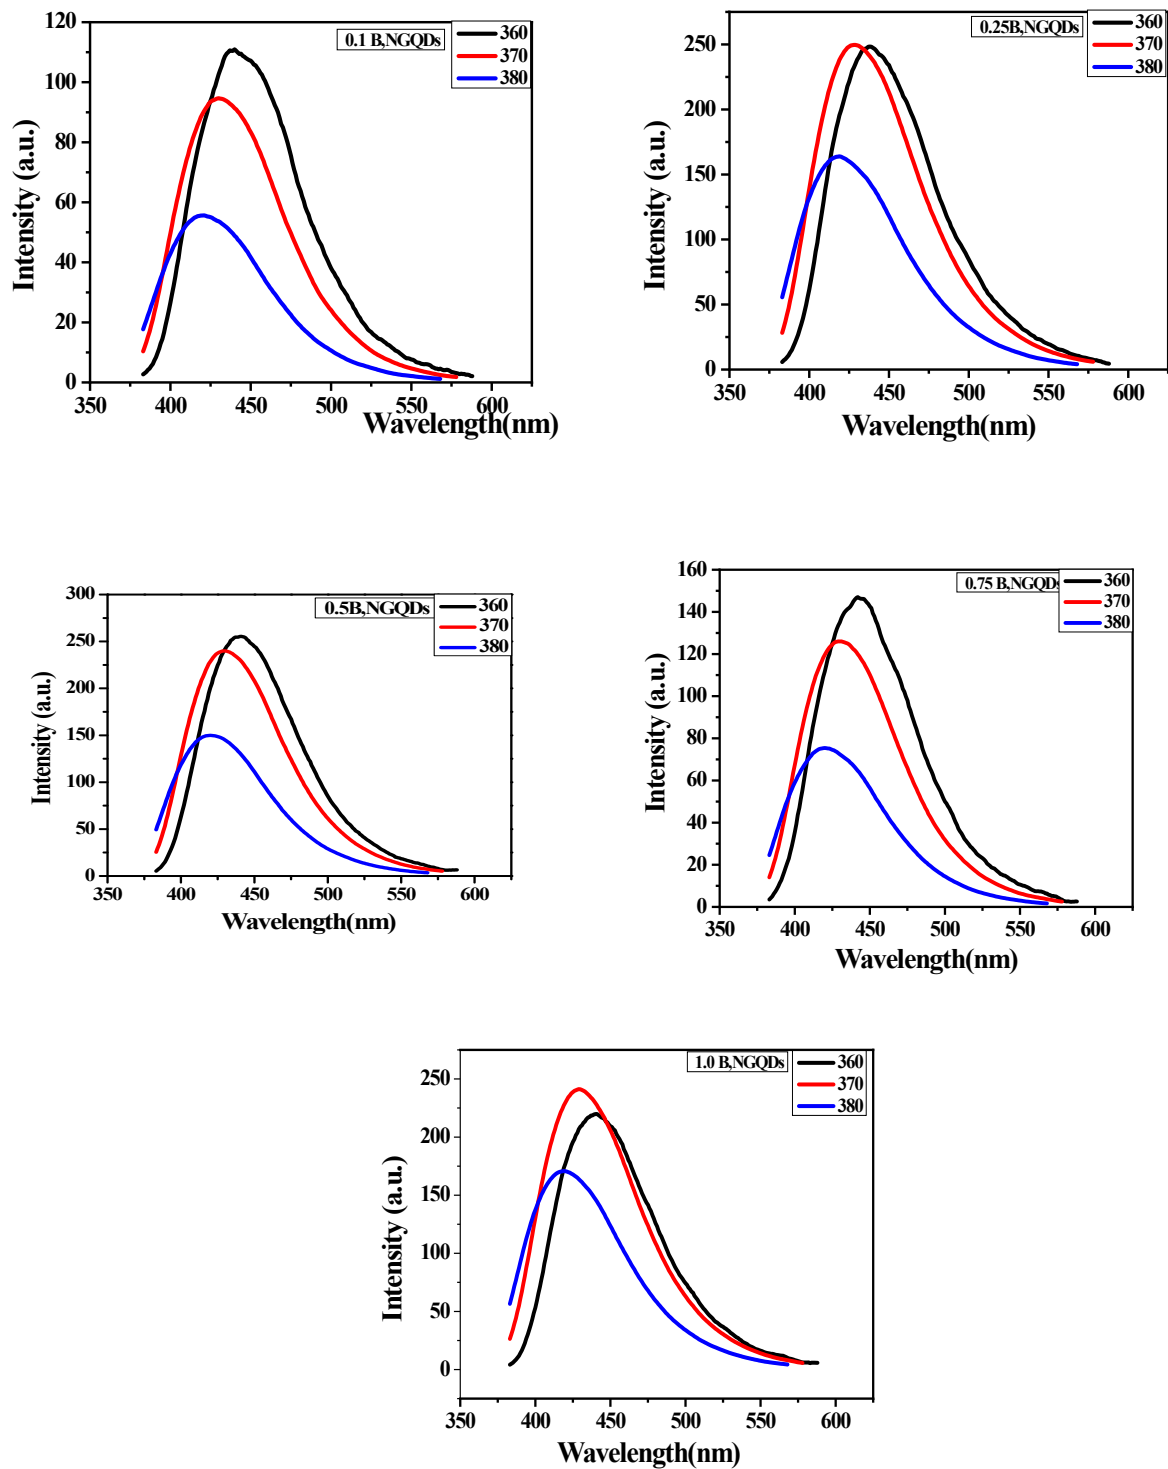

**Fig. S4.** Fluorescence spectra for studying the effect of concentration of B,N-GQDs: (a) 0.1a.u., (b) 0.25 a.u., (c) 0.50 a.u., (d) 0.75 a.u. and 1.0 a.u. along with three different energy of excitation.

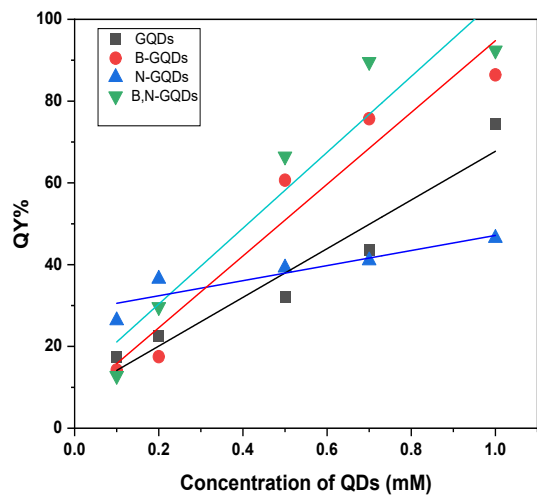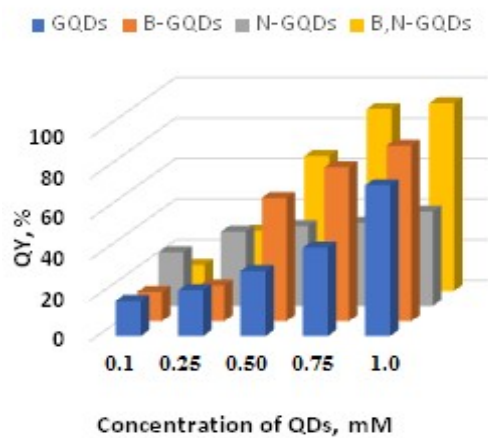

**Fig. S5.** Calibration curve for GQDs, B-GQDs, N-GQDs, B,N-GQDs and their 3D bar plot (a-b).
